# Supplementary material for: Isothiocyanates Potentiate Tazemetostat-Induced Apoptosis by Modulating the Expression of Apoptotic Genes, Members of Polycomb Repressive Complex 2, and Levels of Tri-Methylating Lysine 27 at Histone 3 in Human Malignant Melanoma Cells
Source: MDPI journal article supplement (doi:10.3390/ijms25052745), 2024-02-27
Supplement: s1 [file s1]

## Supplementary Data

### **Isothiocyanates potentiate Tazemetostat-induced apoptosis by modulating the expression of apoptotic genes, members of Polycomb Repressive Complex 2 and levels of trimethylating lysine 27, at Histone 3, in human malignant melanoma cells**

Ioannis Anestopoulos<sup>1†</sup>, Ioannis Paraskevaïdis<sup>1†</sup>, Sotiris Kyriakou<sup>1</sup>, Lambrini Giova<sup>1</sup>, Dimitrios T. Trafalis<sup>2</sup>, Sotiris Botaitis<sup>3</sup>, Rodrigo Franco<sup>4,5</sup>, Aglaia Pappa<sup>6</sup>, Mihalīs I. Panayiotidis<sup>1#</sup>

<sup>1</sup>Department of Cancer Genetics, Therapeutics & Ultrastructural Pathology, The Cyprus Institute of Neurology & Genetics, Nicosia 2371, Cyprus; <sup>2</sup>Laboratory of Pharmacology, Medical School, National & Kapodistrian University of Athens, Athens 11527, Greece; <sup>3</sup>Department of Surgery, University Hospital, Democritus University of Thrace, School of Medicine, Alexandroupolis 68100, Greece; <sup>4</sup>School of Veterinary Medicine & Biomedical Sciences and <sup>5</sup>Redox Biology Centre, University of Nebraska-Lincoln, Nebraska 68583, USA; <sup>6</sup>Department of Molecular Biology & Genetics, Democritus University of Thrace, Alexandroupolis 68100, Greece

<sup>†</sup>These authors contributed equally to this work

**#Corresponding author:** Prof. Dr. Mihalīs I. Panayiotidis, Department of Cancer Genetics, Therapeutics & Ultrastructural Pathology, The Cyprus Institute of Neurology & Genetics, 6 Iroon Avenue, Ayios Dometios, Nicosia 2371, Cyprus. E-mail: mihalisp@cing.ac.cy

Figure S1

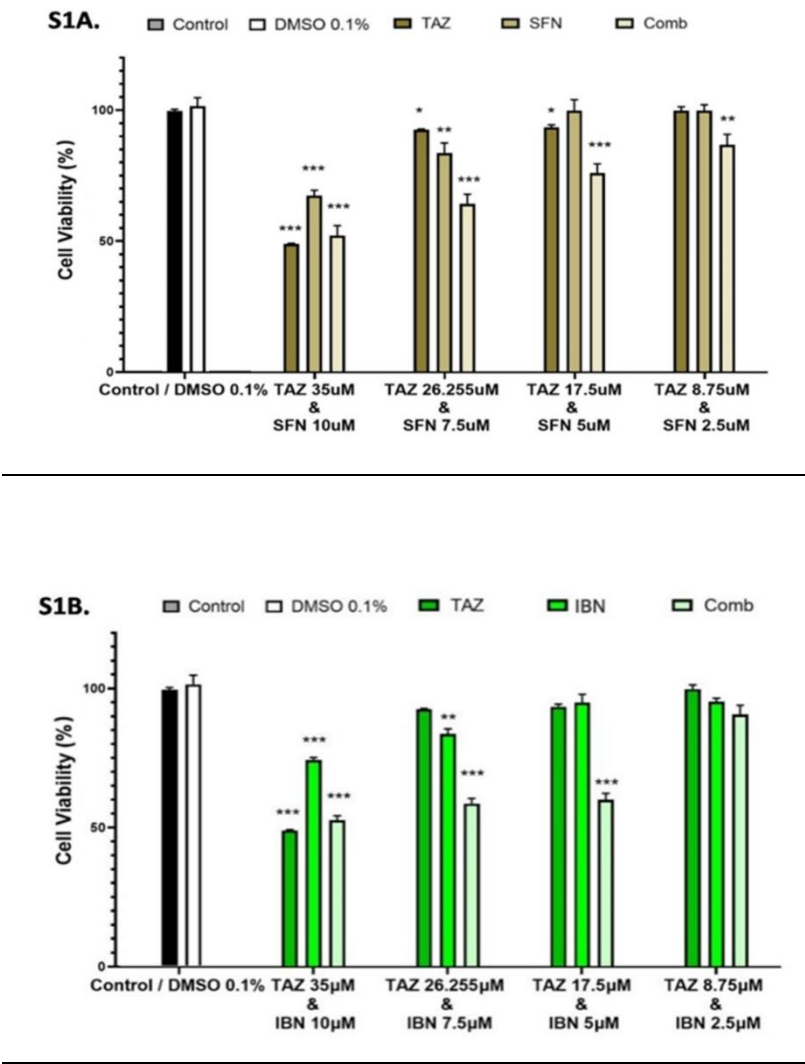

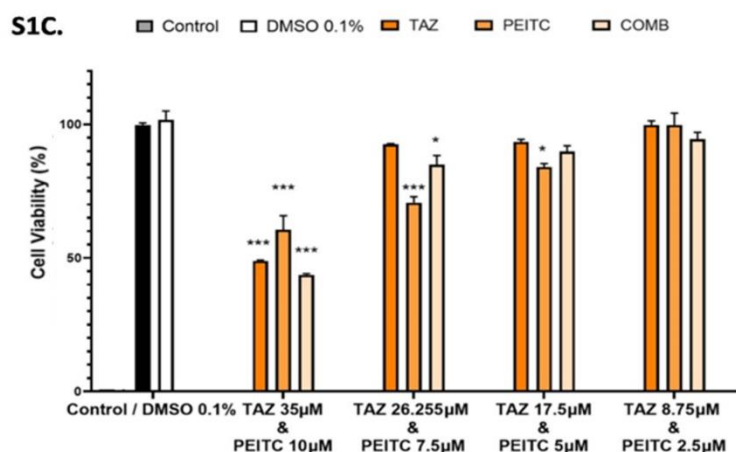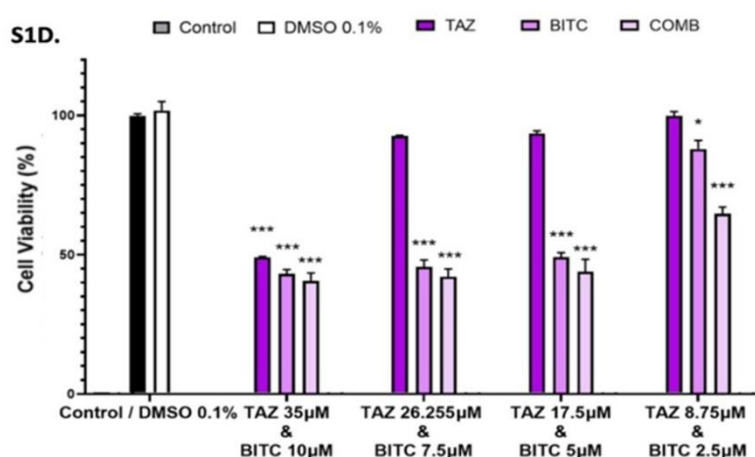

**Cell viability levels of A375 cells under Exposure Protocol 1.** Cell viability levels of A375 cells were recorded following different exposure conditions between TAZ alone, each ITC alone or between TAZ combined with SFN (S1A), IBN (S1B), PEITC (S1C) and BEITC (S1D). Specifically, combinational exposure protocols between TAZ and each ITC were applied as follows: i) 100% the  $EC_{50}$  concentration of TAZ (35µM) : 100% the  $EC_{50}$  value of each ITC (10µM); ii) 75% of the  $EC_{50}$  concentration of TAZ (26.255µM) : 75% of  $EC_{50}$  value of each ITC (7.55µM); iii) 50% of  $EC_{50}$  concentration of TAZ (17.5µM) : 50% of  $EC_{50}$  value of each ITC (5µM); iv) 25% of  $EC_{50}$  concentration of TAZ (6.75µM) : 25% of  $EC_{50}$  value of each ITC (2.5µM). Cell viability was determined by using the Alamar Blue assay. All data are expressed as means of five replicates  $\pm$  SEM and are representative of three independent experiments. Statistical significance is indicated by \* $p<0.05$ , \*\* $p<0.01$ , \*\*\* $p<0.001$  relative to the corresponding 0.1% DMSO controls.

**Figure S2**

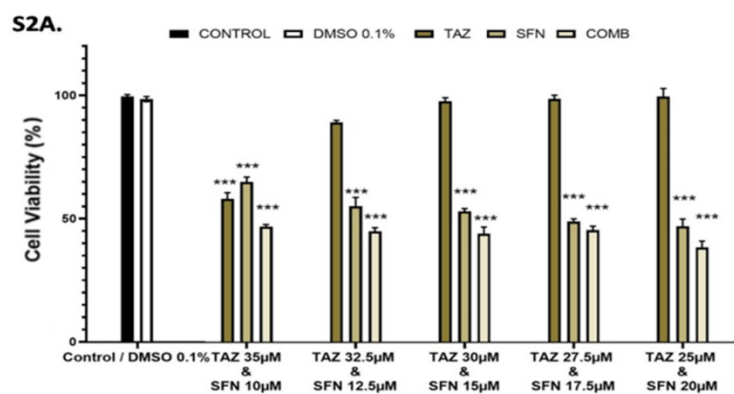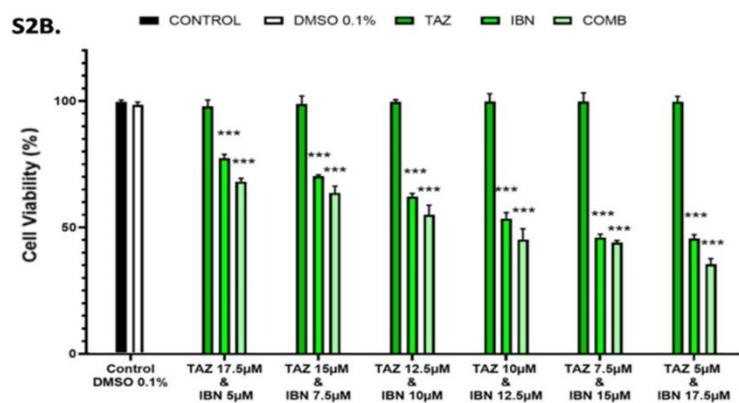

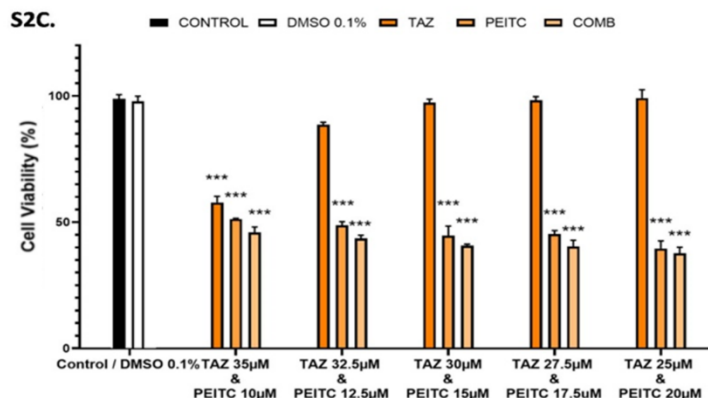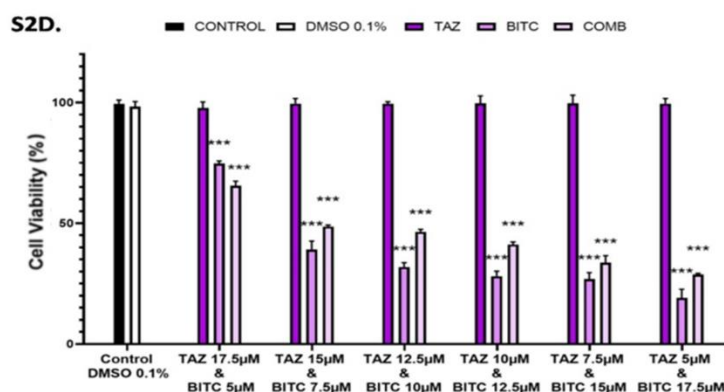

**Cell viability levels of A375 cells under Exposure Protocol 2.** Cell viability levels of A375 cells were recorded following different exposure conditions between TAZ alone, each ITC alone or between TAZ combined with SFN (S2A), IBN (S2B), PEITC (S2C) and BEITC (S2D). Specifically, A375 cells were exposed to gradually decreasing concentrations of the EC<sub>50</sub> concentration of TAZ (by 2.5 μM) together with a parallel gradual increase of the EC<sub>50</sub> concentrations of each ITC (by 2.5 μM) until reached a final concentration of 20 μM, at the most. All data are expressed as means of five replicates ± SEM and are representative of three independent experiments. Statistical significance is indicated by \*p<0.05, \*\*p<0.01, \*\*\*p<0.001 relative to the corresponding 0.1% DMSO controls.

**Figure S3**

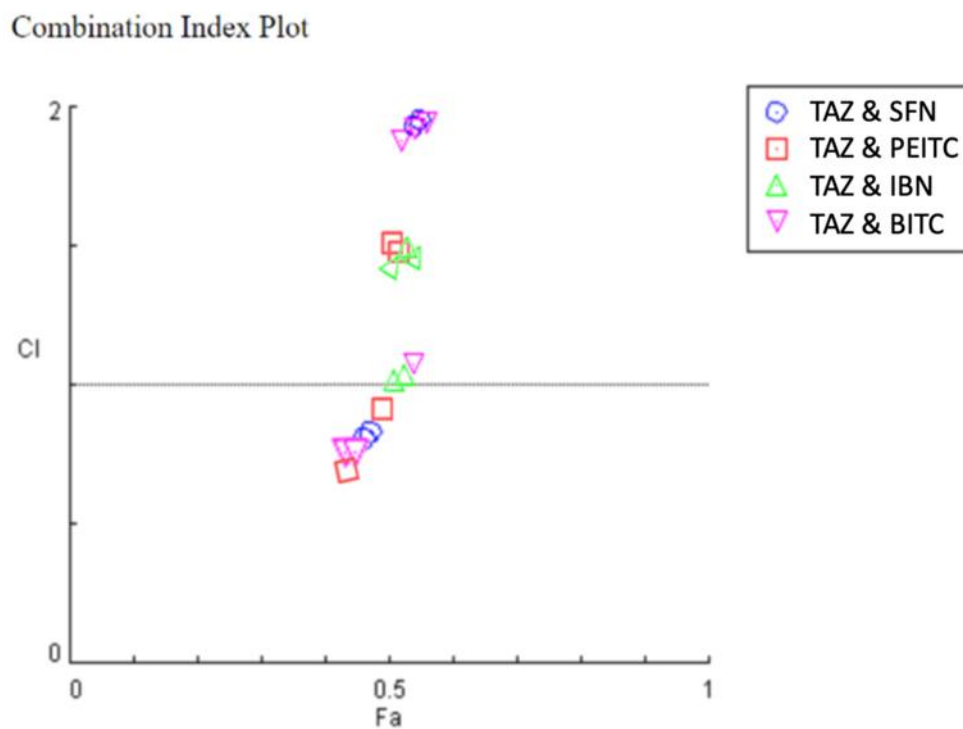

**Combination Index plot of combinatorial treatments of TAZ with different ITCs in A375 cells.** Combination Index (CI) plot descriptive of the combinatorial exposure of TAZ with each ITC against A375 melanoma cells. The interaction of each individual combinatorial exposure was measured using the CompuSyn software, V.20 (Biosoft, Cambridge, UK) where  $CI < 1$  is descriptive of a synergistic,  $CI = 1$  an additive and  $CI > 1$  an antagonistic interaction.

**Figure S4.**

**S4A. Isobologram TAZ+SFN**

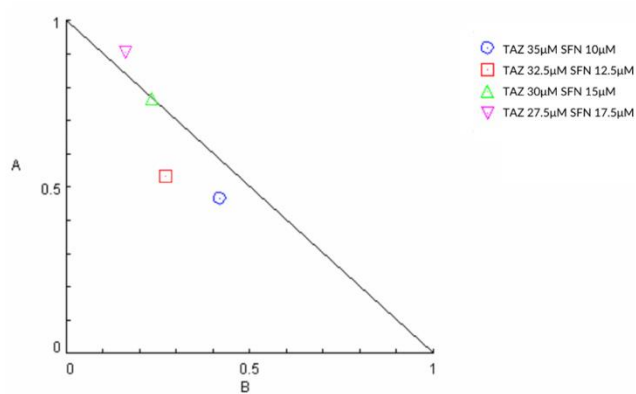

**S4B. Isobologram TAZ+IBN**

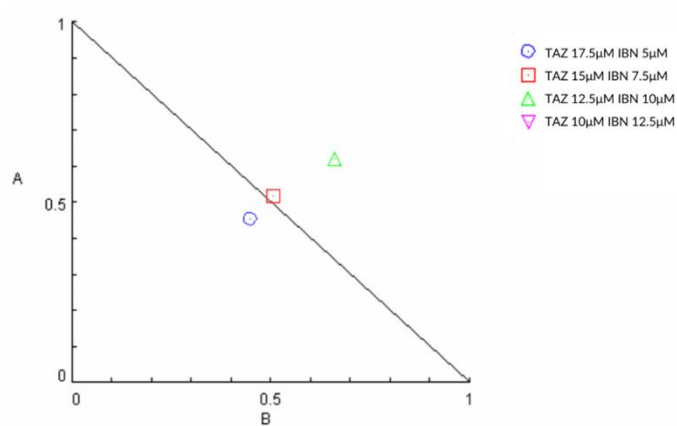

**S4C. Isobologram TAZ+PEITC**

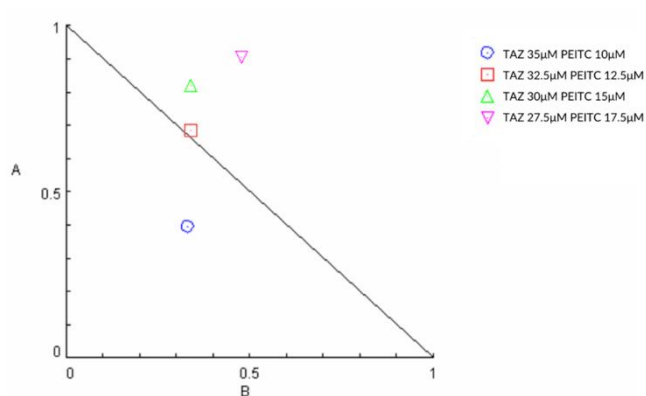

**S4D. Isobologram TAZ+BITC**

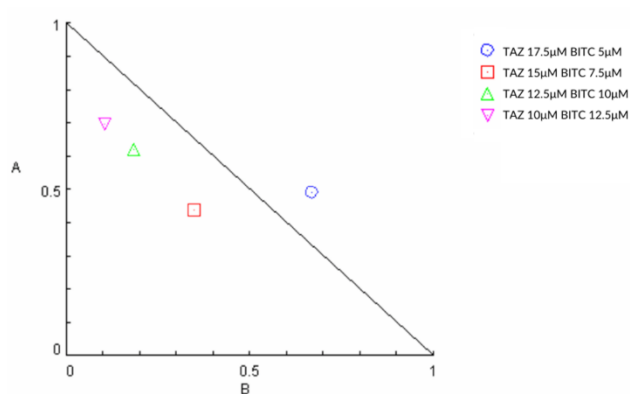

**Normalized isobolograms showing the interaction between TAZ and different ITCs in inhibiting cell growth of A375 melanoma cells.** Isobologram analysis was based on the results of cell viability, following treatments of A375 cells with combined exposure conditions of TAZ and SFN (A), IBN (B), PEITC (C) and BITC (D), according to experimental protocol 2 (Fig. S2). Combination data points that are below the line are synergistic, above the line are antagonistic and on the line are additive. The interaction of each individual combinatorial exposure was measured using the CompuSyn software, V.20 (Biosoft, Cambridge, UK).



**Table S1. Cell viability levels following various combinatorial exposure protocols with TAZ and each of the ITCs in HaCaT cells.** The rationale for the indicated combinatorial exposure conditions was based on their efficacy to reduce the viability levels of A375 cells around their EC<sub>50</sub> value (45-65%) while inducing a safe cytotoxic profile against HaCaT cells (over 80%). To this end, bold highlighted conditions were selected, as optimum, and utilized in the next series of experiments. All data are expressed as means of five replicates  $\pm$  SEM and are representative of three independent experiments.

| <b>EXPOSURE PROTOCOL</b>                                          | <b>CELL VIABILITY LEVELS</b>       |
|-------------------------------------------------------------------|------------------------------------|
| Control                                                           | 100.00 $\pm$ 2.89                  |
| 0.1% DMSO                                                         | 98.10 $\pm$ 2.32                   |
| <b>TAZ (35.0<math>\mu</math>M)+ SFN (10.0<math>\mu</math>M)</b>   | <b>86.51 <math>\pm</math> 2.00</b> |
| TAZ (32.5 $\mu$ M)+ SFN (12.5 $\mu$ M)                            | 79.37 $\pm$ 0.90                   |
| TAZ (30.0 $\mu$ M)+ SFN (15.0 $\mu$ M)                            | 63.01 $\pm$ 3.19                   |
| <b>TAZ (15.0<math>\mu</math>M)+ IBN (7.5<math>\mu</math>M)</b>    | <b>90.12 <math>\pm</math> 1.85</b> |
| TAZ (12.5 $\mu$ M)+ IBN (10.0 $\mu$ M)                            | 79.39 $\pm$ 1.63                   |
| TAZ (10.0 $\mu$ M)+ IBN (12.5 $\mu$ M)                            | 72.34 $\pm$ 0.97                   |
| <b>TAZ (35.0<math>\mu</math>M)+ PEITC (10.0<math>\mu</math>M)</b> | <b>91.11 <math>\pm</math> 1.80</b> |
| TAZ (32.5 $\mu$ M)+ PEITC (12.5 $\mu$ M)                          | 75.01 $\pm$ 3.23                   |
| TAZ (30.0 $\mu$ M)+ PEITC (15.0 $\mu$ M)                          | 69.06 $\pm$ 4.28                   |
| <b>TAZ (15.0<math>\mu</math>M)+ BITC (7.5<math>\mu</math>M)</b>   | <b>82.45 <math>\pm</math> 2.97</b> |

|                             |              |
|-----------------------------|--------------|
| TAZ (12.5μM)+ BITC (10.0μM) | 79.55 ± 4.00 |
| TAZ (10.0μM)+ BITC (12.5μM) | 73.62 ± 4.06 |

**Table S2. Fold change in expression levels of genes involved in intrinsic and extrinsic apoptosis in A375 cells exposed, for 48h, to TAZ as a single agent and/or in combined exposures with each ITC.** Fold changes in gene expression levels were determined by Real-Time PCR (RT-PCR). All data are expressed as means of three replicates ± SEM and are representative of three independent experiments. Gene expression data were normalized to β-actin, using the 2-ΔΔCt method and were expressed as fold-change compared to untreated (control) samples.

| <b>INTRINSIC PATHWAY</b>    |                    |                     |                    |                    |                    |
|-----------------------------|--------------------|---------------------|--------------------|--------------------|--------------------|
|                             | <b>TAZ</b>         | <b>TAZ+SFN</b>      | <b>TAZ+IBN</b>     | <b>TAZ+PEITC</b>   | <b>TAZ+BITC</b>    |
| <b><i>CASP3</i></b>         | <b>1.515±0.019</b> | <b>1.888±0.052</b>  | <b>1.78±0.001</b>  | <b>1.852±0.002</b> | <b>1.81±0.068</b>  |
| <b><i>BID</i></b>           | <b>0.99±0.020</b>  | <b>1.114±0.033</b>  | <b>1.337±0.038</b> | <b>1.08±0.032</b>  | <b>1.576±0.002</b> |
| <b><i>BAX</i></b>           | <b>2.44±0.006</b>  | <b>2.062±0.080</b>  | <b>1.752±0.067</b> | <b>1.83±0.012</b>  | <b>2.16±0.002</b>  |
| <b><i>XIAP</i></b>          | <b>0.89±0.001</b>  | <b>0.59±0.029</b>   | <b>0.742±0.137</b> | <b>0.84±0.210</b>  | <b>0.705±0.190</b> |
| <b><i>PMAIP1</i></b>        | <b>1.57±0.900</b>  | <b>1.0877±0.012</b> | <b>1.147±0.058</b> | <b>0.942±0.002</b> | <b>1.212±0.015</b> |
| <b><i>BAD</i></b>           | <b>1.24±1.160</b>  | <b>2.539±0.305</b>  | <b>4.635±0.002</b> | <b>2.1±0.342</b>   | <b>1.786±0.642</b> |
| <b><i>CYCS</i></b>          | <b>1.22±0.009</b>  | <b>1.314±0.122</b>  | <b>1.348±0.002</b> | <b>1.42±0.124</b>  | <b>1.568±0.095</b> |
| <b><i>BAK1</i></b>          | <b>5.064±0.021</b> | <b>2.26±0.860</b>   | <b>5.301±0.127</b> | <b>1.19±0.089</b>  | <b>3.17±0.011</b>  |
| <b><i>APAF1</i></b>         | <b>4.992±0.032</b> | <b>5.902±0.100</b>  | <b>5.121±0.100</b> | <b>6.21±0.901</b>  | <b>6.121±0.567</b> |
| <b><i>CASP9</i></b>         | <b>1.229±0.403</b> | <b>1.166±0.089</b>  | <b>1.786±0.040</b> | <b>1.09±0.003</b>  | <b>1.642±0.012</b> |
| <b><i>CASP2</i></b>         | <b>2.745±0.395</b> | <b>2.37±0.036</b>   | <b>2.194±0.025</b> | <b>2.42±0.213</b>  | <b>2.173±0.075</b> |
| <b><i>DIABLO (SMAC)</i></b> | <b>1.896±0.058</b> | <b>1.075±0.019</b>  | <b>1.608±0.007</b> | <b>1.103±0.013</b> | <b>1.426±0.008</b> |
| <b><i>BCL2L1 (BIM)</i></b>  | <b>0.082±0.009</b> | <b>1.371±0.076</b>  | <b>1.355±0.124</b> | <b>1.124±0.035</b> | <b>1.310±0.039</b> |
| <b><i>CASP6</i></b>         | <b>1.494±0.038</b> | <b>2.063±0.256</b>  | <b>2.495±0.155</b> | <b>2.032±0.421</b> | <b>5.211±0.081</b> |
| <b><i>CASP7</i></b>         | <b>1.05±0.102</b>  | <b>1.103±0.562</b>  | <b>1.058±0.139</b> | <b>1.432±0.242</b> | <b>1.037±0.024</b> |
| <b><i>MCL1</i></b>          | <b>0.104±0.021</b> | <b>0.592±0.066</b>  | <b>0.077±0.039</b> | <b>0.720±0.042</b> | <b>0.966±0.064</b> |

|               |                    |                    |                    |                    |                     |
|---------------|--------------------|--------------------|--------------------|--------------------|---------------------|
| <i>BCL2</i>   | <b>1.029±0.030</b> | <b>1.016±0.480</b> | <b>0.980±0.020</b> | <b>1.092±0.132</b> | <b>1.033±0.052</b>  |
| <i>BCL2L1</i> | <b>0.439±0.039</b> | <b>0.972±0.003</b> | <b>1.099±0.031</b> | <b>0.801±0.002</b> | <b>0.745±0.0355</b> |

| EXTRINSIC PATHWAY                   |                    |                    |                    |                    |                    |
|-------------------------------------|--------------------|--------------------|--------------------|--------------------|--------------------|
|                                     | TAZ                | TAZ+SFN            | TAZ+IBN            | TAZ+PEITC          | TAZ+BITC           |
| <i>FASL</i>                         | <b>1.102±0.096</b> | <b>1.002±0.515</b> | <b>1.003±0.095</b> | <b>1.142±0.002</b> | <b>1.022±0.351</b> |
| <i>FAS</i>                          | <b>1.375±0.124</b> | <b>1.039±0.742</b> | <b>1.393±0.145</b> | <b>1.462±0.075</b> | <b>0.879±0.052</b> |
| <i>FAIM</i>                         | <b>1.045±0.040</b> | <b>0.838±0.481</b> | <b>0.916±0.145</b> | <b>0.920±0.003</b> | <b>0.913±0.012</b> |
| <i>TNFRSF10</i><br>( <i>TRAIL</i> ) | <b>2.107±0.415</b> | <b>1.612±0.762</b> | <b>6.268±0.081</b> | <b>1.529±0.052</b> | <b>1.990±0.137</b> |
| <i>TNFRSF10D</i>                    | <b>0.745±0.395</b> | <b>0.837±0.036</b> | <b>0.794±0.025</b> | <b>0.842±0.213</b> | <b>0.873±0.075</b> |
| <i>TNFRSF10C</i>                    | <b>0.839±0.162</b> | <b>0.836±0.014</b> | <b>0.907±0.163</b> | <b>0.739±0.034</b> | <b>0.943±0.005</b> |
| <i>TNFRSF10CB</i>                   | <b>1.048±0.325</b> | <b>1.037±0.021</b> | <b>1.065±0.133</b> | <b>1.092±0.031</b> | <b>0.913±0.061</b> |
| <i>TNFRSF10A</i>                    | <b>1.622±0.001</b> | <b>1.348±0.047</b> | <b>1.160±0.070</b> | <b>1.423±0.004</b> | <b>1.450±0.091</b> |
| <i>FADD</i>                         | <b>1.102±0.001</b> | <b>1.068±0.133</b> | <b>1.047±0.120</b> | <b>1.342±0.103</b> | <b>1.052±0.188</b> |
| <i>CASPASE8</i>                     | <b>1.57±0.900</b>  | <b>1.877±0.012</b> | <b>1.547±0.058</b> | <b>1.942±0.002</b> | <b>1.612±0.015</b> |
| <i>CASPASE 10</i>                   | <b>1.22±0.009</b>  | <b>1.314±0.122</b> | <b>1.348±0.002</b> | <b>1.420±0.124</b> | <b>1.568±0.095</b> |
| <i>C-FLAR</i>                       | <b>0.351±0.075</b> | <b>0.303±0.009</b> | <b>0.406±0.049</b> | <b>0.323±0.122</b> | <b>0.461±0.026</b> |
| <i>TNF</i>                          | <b>1.657±0.463</b> | <b>2.147±0.038</b> | <b>2.090±0.020</b> | <b>2.682±0.001</b> | <b>1.583±0.354</b> |
| <i>TNFRSF1A</i><br>( <i>TNFR1</i> ) | <b>1.55±0.928</b>  | <b>9.143±0.051</b> | <b>5.214±0.008</b> | <b>5.130±0.053</b> | <b>4.655±0.020</b> |
| <i>TRADD</i>                        | <b>4.992±0.032</b> | <b>5.902±0.100</b> | <b>5.121±0.100</b> | <b>6.210±0.901</b> | <b>6.121±0.567</b> |
| <i>TRAF2</i>                        | <b>3.252±0.347</b> | <b>1.331±0.054</b> | <b>2.514±0.028</b> | <b>1.582±0.042</b> | <b>1.092±0.055</b> |
| <i>BIRC2</i><br>( <i>CIAP1</i> )    | <b>1.412±0.026</b> | <b>0.795±0.074</b> | <b>0.825±0.024</b> | <b>0.069±0.120</b> | <b>0.610±0.077</b> |
| <i>BIRC3</i><br>( <i>CIAP2</i> )    | <b>0.676±0.054</b> | <b>0.495±0.174</b> | <b>0.401±0.174</b> | <b>0.492±0.005</b> | <b>0.592±0.303</b> |
| <i>TRAF1</i>                        | <b>0.821±0.141</b> | <b>0.992±0.050</b> | <b>1.010±0.625</b> | <b>1.021±0.013</b> | <b>1.272±0.426</b> |
| <i>TRAF5</i>                        | <b>1.44±0.699</b>  | <b>5.469±0.403</b> | <b>3.855±0.658</b> | <b>5.992±0.341</b> | <b>1.405±0.017</b> |
| <i>TNFAIP3/A20</i>                  | <b>0.902±0.001</b> | <b>0.899±0.029</b> | <b>0.842±0.137</b> | <b>0.732±0.210</b> | <b>0.705±0.190</b> |

**Table S3. Fold change in expression levels of genes involved in intrinsic and extrinsic apoptosis in Colo-679 cells exposed, for 48h, to TAZ as a single agent and/or in combined exposures with each ITC.** Fold changes in gene expression levels were determined by Real-Time PCR (RT-PCR). All data are expressed as means of three replicates  $\pm$  SEM and are representative of three independent experiments. Gene expression data were normalized to  $\beta$ -actin, using the  $2^{-\Delta\Delta C_t}$  method and were expressed as fold-change compared to untreated (control) samples.

| <b>INTRINSIC PATHWAY</b>        |                                   |                                   |                                   |                                   |                                   |
|---------------------------------|-----------------------------------|-----------------------------------|-----------------------------------|-----------------------------------|-----------------------------------|
|                                 | <b>TAZ</b>                        | <b>TAZ+SFN</b>                    | <b>TAZ+IBN</b>                    | <b>TAZ+PEITC</b>                  | <b>TAZ+BITC</b>                   |
| <b><i>CASP3</i></b>             | <b>1.219<math>\pm</math>0.031</b> | <b>1.530<math>\pm</math>0.014</b> | <b>1.359<math>\pm</math>0.032</b> | <b>1.629<math>\pm</math>0.328</b> | <b>1.721<math>\pm</math>0.032</b> |
| <b><i>BID</i></b>               | <b>1.241<math>\pm</math>0.039</b> | <b>1.429<math>\pm</math>0.039</b> | <b>1.429<math>\pm</math>0.012</b> | <b>1.420<math>\pm</math>0.932</b> | <b>1.672<math>\pm</math>0.084</b> |
| <b><i>BAX</i></b>               | <b>1.924<math>\pm</math>0.042</b> | <b>1.948<math>\pm</math>0.029</b> | <b>1.602<math>\pm</math>0.892</b> | <b>2.019<math>\pm</math>0.382</b> | <b>1.982<math>\pm</math>0.042</b> |
| <b><i>XIAP</i></b>              | <b>1.121<math>\pm</math>0.029</b> | <b>0.913<math>\pm</math>0.079</b> | <b>0.929<math>\pm</math>0.249</b> | <b>0.719<math>\pm</math>0.029</b> | <b>0.902<math>\pm</math>0.249</b> |
| <b><i>PMAIP1</i></b>            | <b>1.103<math>\pm</math>0.204</b> | <b>1.231<math>\pm</math>0.029</b> | <b>1.001<math>\pm</math>0.039</b> | <b>1.429<math>\pm</math>0.329</b> | <b>1.182<math>\pm</math>0.092</b> |
| <b><i>BAD</i></b>               | <b>0.924<math>\pm</math>0.021</b> | <b>2.012<math>\pm</math>0.039</b> | <b>2.952<math>\pm</math>0.042</b> | <b>2.443<math>\pm</math>0.042</b> | <b>1.292<math>\pm</math>0.034</b> |
| <b><i>CYCS</i></b>              | <b>1.029<math>\pm</math>0.029</b> | <b>1.210<math>\pm</math>0.082</b> | <b>1.492<math>\pm</math>0.095</b> | <b>1.329<math>\pm</math>0.320</b> | <b>1.029<math>\pm</math>0.291</b> |
| <b><i>BAK1</i></b>              | <b>2.293<math>\pm</math>0.129</b> | <b>2.420<math>\pm</math>0.193</b> | <b>1.234<math>\pm</math>0.391</b> | <b>1.829<math>\pm</math>0.093</b> | <b>2.219<math>\pm</math>0.032</b> |
| <b><i>APAF1</i></b>             | <b>3.211<math>\pm</math>0.013</b> | <b>3.992<math>\pm</math>0.031</b> | <b>4.829<math>\pm</math>0.009</b> | <b>4.90<math>\pm</math>0.003</b>  | <b>5.230<math>\pm</math>0.002</b> |
| <b><i>CASP9</i></b>             | <b>1.682<math>\pm</math>0.311</b> | <b>1.428<math>\pm</math>0.021</b> | <b>1.929<math>\pm</math>0.032</b> | <b>1.429<math>\pm</math>0.203</b> | <b>1.824<math>\pm</math>0.249</b> |
| <b><i>CASP2</i></b>             | <b>1.839<math>\pm</math>0.049</b> | <b>3.572<math>\pm</math>0.103</b> | <b>2.453<math>\pm</math>0.042</b> | <b>2.824<math>\pm</math>0.192</b> | <b>3.529<math>\pm</math>0.127</b> |
| <b><i>DIABLO</i><br/>(SMAC)</b> | <b>1.244<math>\pm</math>0.049</b> | <b>1.294<math>\pm</math>0.294</b> | <b>1.432<math>\pm</math>0.029</b> | <b>1.320<math>\pm</math>0.032</b> | <b>1.120<math>\pm</math>0.039</b> |
| <b><i>BCL2L1</i><br/>(BIM)</b>  | <b>0.903<math>\pm</math>0.024</b> | <b>1.423<math>\pm</math>0.049</b> | <b>1.329<math>\pm</math>0.082</b> | <b>1.439<math>\pm</math>0.049</b> | <b>1.728<math>\pm</math>0.039</b> |
| <b><i>CASP6</i></b>             | <b>1.210<math>\pm</math>0.042</b> | <b>1.932<math>\pm</math>0.194</b> | <b>1.329<math>\pm</math>0.032</b> | <b>1.235<math>\pm</math>0.241</b> | <b>2.103<math>\pm</math>0.391</b> |
| <b><i>CASP7</i></b>             | <b>1.330<math>\pm</math>0.432</b> | <b>1.492<math>\pm</math>0.239</b> | <b>1.029<math>\pm</math>0.029</b> | <b>1.782<math>\pm</math>0.092</b> | <b>1.324<math>\pm</math>0.042</b> |

|               |                     |                     |                     |                     |                     |
|---------------|---------------------|---------------------|---------------------|---------------------|---------------------|
| <i>MCL1</i>   | <b>0.429</b> ±0.249 | <b>0.892</b> ±0.023 | <b>0.530</b> ±0.040 | <b>0.920</b> ±0.093 | <b>1.103</b> ±0.078 |
| <i>BCL2</i>   | <b>1.392</b> ±0.204 | <b>1.284</b> ±0.029 | <b>1.392</b> ±0.920 | <b>1.923</b> ±0.033 | <b>1.299</b> ±0.029 |
| <i>BCL2L1</i> | <b>0.892</b> ±0.042 | <b>0.823</b> ±0.320 | <b>0.929</b> ±0.194 | <b>0.702</b> ±0.320 | <b>1.203</b> ±0.013 |

| EXTRINSIC PATHWAY                   |                     |                     |                     |                     |                     |
|-------------------------------------|---------------------|---------------------|---------------------|---------------------|---------------------|
|                                     | TAZ                 | TAZ+SFN             | TAZ+IBN             | TAZ+PEITC           | TAZ+BITC            |
| <i>FASL</i>                         | <b>1.209</b> ±0.024 | <b>1.382</b> ±0.329 | <b>1.214</b> ±0.029 | <b>1.492</b> ±0.492 | <b>1.102</b> ±0.293 |
| <i>FAS</i>                          | <b>1.637</b> ±0.294 | <b>1.392</b> ±0.424 | <b>1.628</b> ±0.049 | <b>1.104</b> ±0.029 | <b>1.210</b> ±0.091 |
| <i>FAIM</i>                         | <b>1.103</b> ±0.043 | <b>1.121</b> ±0.032 | <b>0.820</b> ±0.140 | <b>0.792</b> ±0.129 | <b>0.924</b> ±0.029 |
| <i>TNFRSF10</i><br>( <i>TRAIL</i> ) | <b>1.723</b> ±0.028 | <b>1.820</b> ±0.293 | <b>1.942</b> ±0.099 | <b>1.992</b> ±0.320 | <b>2.492</b> ±0.320 |
| <i>TNFRSF10D</i>                    | <b>1.102</b> ±0.293 | <b>1.021</b> ±0.029 | <b>0.920</b> ±0.092 | <b>0.992</b> ±0.104 | <b>1.201</b> ±0.039 |
| <i>TNFRSF10C</i>                    | <b>0.920</b> ±0.439 | <b>0.942</b> ±0.294 | <b>0.603</b> ±0.240 | <b>0.829</b> ±0.312 | <b>1.243</b> ±0.021 |
| <i>TNFRSF10CB</i>                   | <b>1.240</b> ±0.421 | <b>1.102</b> ±0.219 | <b>1.293</b> ±0.320 | <b>1.112</b> ±0.043 | <b>1.210</b> ±0.091 |
| <i>TNFRSF10A</i>                    | <b>1.213</b> ±0.029 | <b>1.429</b> ±0.093 | <b>1.482</b> ±0.329 | <b>1.392</b> ±0.328 | <b>1.943</b> ±0.201 |
| <i>FADD</i>                         | <b>1.204</b> ±0.391 | <b>1.039</b> ±0.019 | <b>1.102</b> ±0.102 | <b>1.428</b> ±0.210 | <b>1.129</b> ±0.210 |
| <i>CASPASE8</i>                     | <b>1.319</b> ±0.219 | <b>1.219</b> ±0.013 | <b>1.928</b> ±0.328 | <b>1.221</b> ±0.039 | <b>1.567</b> ±0.032 |
| <i>CASPASE 10</i>                   | <b>1.201</b> ±0.032 | <b>1.426</b> ±0.043 | <b>1.232</b> ±0.094 | <b>1.219</b> ±0.001 | <b>1.928</b> ±0.210 |
| <i>C-FLAR</i>                       | <b>0.582</b> ±0.192 | <b>0.792</b> ±0.021 | <b>0.672</b> ±0.024 | <b>0.910</b> ±0.211 | <b>0.674</b> ±0.031 |
| <i>TNF</i>                          | <b>1.205</b> ±0.059 | <b>2.882</b> ±0.002 | <b>2.320</b> ±0.149 | <b>2.253</b> ±0.112 | <b>1.924</b> ±0.032 |
| <i>TNFRSF1A</i><br>( <i>TNFR1</i> ) | <b>1.832</b> ±0.053 | <b>3.249</b> ±0.104 | <b>3.243</b> ±0.003 | <b>4.243</b> ±0.043 | <b>5.252</b> ±0.039 |
| <i>TRADD</i>                        | <b>3.214</b> ±0.104 | <b>6.254</b> ±0.130 | <b>5.043</b> ±0.129 | <b>4.942</b> ±0.001 | <b>4.543</b> ±0.018 |
| <i>TRAF2</i>                        | <b>2.193</b> ±0.021 | <b>1.392</b> ±0.039 | <b>1.928</b> ±0.049 | <b>1.928</b> ±0.073 | <b>1.674</b> ±0.023 |
| <i>BIRC2</i><br>( <i>CIAP1</i> )    | <b>1.829</b> ±0.037 | <b>1.203</b> ±0.206 | <b>0.922</b> ±0.042 | <b>0.822</b> ±0.102 | <b>0.782</b> ±0.001 |
| <i>BIRC3</i><br>( <i>CIAP2</i> )    | <b>0.892</b> ±0.002 | <b>0.864</b> ±0.027 | <b>0.804</b> ±0.094 | <b>0.792</b> ±0.067 | <b>0.881</b> ±0.012 |
| <i>TRAF1</i>                        | <b>0.955</b> ±0.032 | <b>1.103</b> ±0.003 | <b>1.142</b> ±0.032 | <b>0.921</b> ±0.094 | <b>0.892</b> ±0.074 |
| <i>TRAF5</i>                        | <b>1.730</b> ±0.004 | <b>4.357</b> ±0.027 | <b>2.934</b> ±0.003 | <b>3.452</b> ±0.039 | <b>1.839</b> ±0.092 |
| <i>TNFAIP3/A20</i>                  | <b>0.993</b> ±0.024 | <b>0.928</b> ±0.018 | <b>0.911</b> ±0.049 | <b>0.892</b> ±0.032 | <b>0.983</b> ±0.072 |

**Table S4. List of primer sequences used in RT-PCR experiments.**

| <b>GENE</b>                        | <b>FORWARD PRIMER</b>           | <b>REVERSE PRIMER</b>         |
|------------------------------------|---------------------------------|-------------------------------|
| <b>INTRINSIC APOPTOTIC PATHWAY</b> |                                 |                               |
| <i>CASP2</i>                       | 5'- ATTGGATCCCTTGGGCACCTC-3'    | 5' ATCATGTCTGAGCGCGTGGG-3'    |
| <i>CASP3</i>                       | 5' TTATTCAGGCCTGCCGTGGT-3'      | 5'- AGCATGGCACAAAGCGACTG-3'   |
| <i>CASP6</i>                       | 5- TTTGGCTGCAATGAGCTCGG-3'      | 5'- GGCATCTGCGTGGCTAACAG-3'   |
| <i>CASP7</i>                       | 5'- AAGCTGAGGGAGCGTCCTAC-3'     | 5- ACCGGTCTGGCTTAGCATCC-3'    |
| <i>CASP9</i>                       | 5'-CGGTGACGCAAGAGCGAATC-3'      | 5- GATCAGCTGCCTGGCCTGAT-3'    |
| <i>APAF1</i>                       | 5'- GTTGGGTTCATGGTGTGATG-3'     | 5'- TTTGTCTCCCAGAGCCTGA-3'    |
| <i>BAD</i>                         | 5'- TCAGGGGCCTCGAGATCGG-3'      | 5'- TCCTGCTCACTCGGCTCAAA-3'   |
| <i>BAK1</i>                        | 5'- AGACCTGAAAAATGGCTTCG        | 5'- CGGAAAACCTCCTCTGTGTC-3'   |
| <i>BCL2</i>                        | 5'- AGTACCTGAACCGGCACCT-3'      | 5'- GCCGTACAGTTCCACAAAGG-3'   |
| <i>BID</i>                         | 5'- TGCAGCTCAGGAACACCA-3'       | 5'-TCTCCATGTCTCTAGGGTAGGC-3'  |
| <i>BAX</i>                         | 5'- ACCTTGACTTGATTAGTGCCTTCT-3' | 5'- GGGTCATCAATGAACTTGAGC-3'  |
| <i>XIAP</i>                        | 5'- GCAAGAGCTCAAGGAGACCA-3'     | 5- AAGGGTATTAGGATGGGAGTTCA-3' |
| <i>MCL1</i>                        | 5'- TTACGACGGGTGTTGGGGATGG-3'   | 5'- CTGCCCCAGTTTGTTACGCC-3'   |
| <i>CYCS</i>                        | 5'- TTCGGAGCGGGAGTGTTTCGT-3'    | 5'- TGTGGCACTGGGAACACTTCAT-3' |

|                                    |                                |                                 |
|------------------------------------|--------------------------------|---------------------------------|
| <i>DIABLO</i>                      | 5'- TGACTGCAGTTGGTCTTTCAG-3'   | 5'- GCGGTTATAGAGGCCTGATCT-3'    |
| <i>BCL2L11</i>                     | 5'- ACTGGAGAGCTCATTGCAGAC-3'   | 5'- AAATACCAGGACCCGAAGGT-3'     |
| <i>BCL2L1</i>                      | 5'- CGTGGAAAGCGTAGACAAG-3'     | 5'- AAGAGTGAGCCCAGCAGAA-3'      |
| <i>PMAIP1</i>                      | 5'- CAAGAACGCTCAACCGAGCC-3'    | 5'- AGGAGTCCCCTCATGCAAGT-3'     |
| <b>EXTRINSIC APOPTOTIC PATHWAY</b> |                                |                                 |
| <i>CASP8</i>                       | 5'- GGCGGAGGGTCGATCATCTAT-3'   | 5'- TTCCTTCTCCCAGGATGACCC-3'    |
| <i>CASP10</i>                      | 5'- GGTAATAATGAGGGCAGCTGTGT-3' | 5'- TGAACCCAAGCCACTGGAACA-3'    |
| <i>FAS</i>                         | 5'- TTTTCCTCATGGCTTCACCT-3'    | 5'- ATGTGGCTGTGCTCATTGAC-3'     |
| <i>BIRC2</i>                       | 5'- ATCGTGCGTCAGAGTGAGC-3'     | 5'- CGCCGACAAGGAGATACG-3'       |
| <i>BIRC3</i>                       | 5'- GCTTGTCTTGCTGGTGCAT-3'     | 5'- TCCCGAGATTAGACTAAGTCCCTT-3' |
| <i>C-FLAR</i>                      | 5'- TCCATCTTGGGTGCGCCTTC-3'    | 5'- TCCGGGCCAGTCAACAGAAA-3'     |
| <i>FADD</i>                        | 5'- CCGAGCTCAAGTTCCTATGC-3'    | 5'- AGGTCTAGGCCGCTCTGC-3'       |
| <i>FAIM2</i>                       | 5'- ATCGGAGCGAAGCAGAGAGG-3'    | 5'- CACAGTGGTTGAGCATGGGC-3'     |
| <i>FASLG</i>                       | 5'- GAGTCTACCAGCCAGATGCACA-3'  | 5'- AGGCATGGACCTTGAGTTGG-3'     |
| <i>TNFRSF10A</i>                   | 5'- TACGCCCTGGAGTGACATCG-3'    | 5'- GACCCAAGCGCCAGAAACAC-3'     |
| <i>TNFRSF10C</i>                   | 5'- CCCTAAAGTTCGTCGTCGTC-3'    | 5'- TGGTGGCAGAGTAAGCTAGGA-3'    |
| <i>TNF</i>                         | 5'- TGCACTTTGGAGTGATCGGC-3'    | 5'- TTGTCACTCGGGGTTCGAGA-3'     |
| <i>TNFAIP3</i>                     | 5'- TGCACACTGTGTTTCATCGAG-3'   | 5'- ACGCTGTGGGACTGACTTTC-3'     |
| <i>TNFRSF10D</i>                   | 5'- AAGTTCGTCGTCTTCATCGTC-3'   | 5'- GATGGTGGCAGAGTCAACC-3'      |
| <i>TNFRSF1B</i>                    | 5'- CCAGTGCGTTGGACAGAAGG-3'    | 5'- ATGGCCACCAGGGGAAGAAT-3'     |
| <i>TNFRSF10</i>                    | 5'- TCACAGTGCTCCTGCAGTCT-3'    | 5'- GCCACTTTTGGAGTACTTGTCC-3'   |
| <i>TRADD</i>                       | 5'- TAGTGCAGCAGGAGGTGAGATG-3'  | 5'- CCAGCGAGGACTCCACAAAC-3'     |
| <i>TRAF2</i>                       | 5'- GCATACCCGCCATCTTCTC-3'     | 5'- CGCCGTTCAAGGTAGATACG-3'     |
| <i>TRAF5</i>                       | 5'- ATGCCACTTCCCTACTGCTC-3'    | 5'- CATGGCCCATACTCATCCTT-3'     |
